# Supplementary material for: Mechanics of metal-catecholate complexes: The roles of coordination state and metal types
Source: PubMed Central journal article supplement — Sci Rep. 2013 Oct 10;3:2914. doi: 10.1038/srep02914 (PMC3794374; doi:10.1038/srep02914), 2013-10-10
Supplement: srep02914-s1.pdf [file srep02914-s1.pdf]

## **Supplementary Information**

### **Mechanics of metal-catecholate complexes: The roles of coordination state and metal types**

Zhiping Xu

Department of Engineering Mechanics and Center for Nano and Micro Mechanics,  
Tsinghua University, Beijing 100084, China.

Email: [xuzp@tsinghua.edu.cn](mailto:xuzp@tsinghua.edu.cn)

This supplementary information contains:

1. Figures S1.
2. Table T1 and T2.
3. Movies of loaded metal-coordination complexes (for Fe and Ti):
  - M1. Movie of pulling a Fe-based bis-complex
  - M2. Movie of pulling a Ti-based bis-complex
  - M3. Movie of pulling a Fe-based tris-complex
  - M4. Movie of pulling a Ti-based tris-complex

## 1. Figures and captions

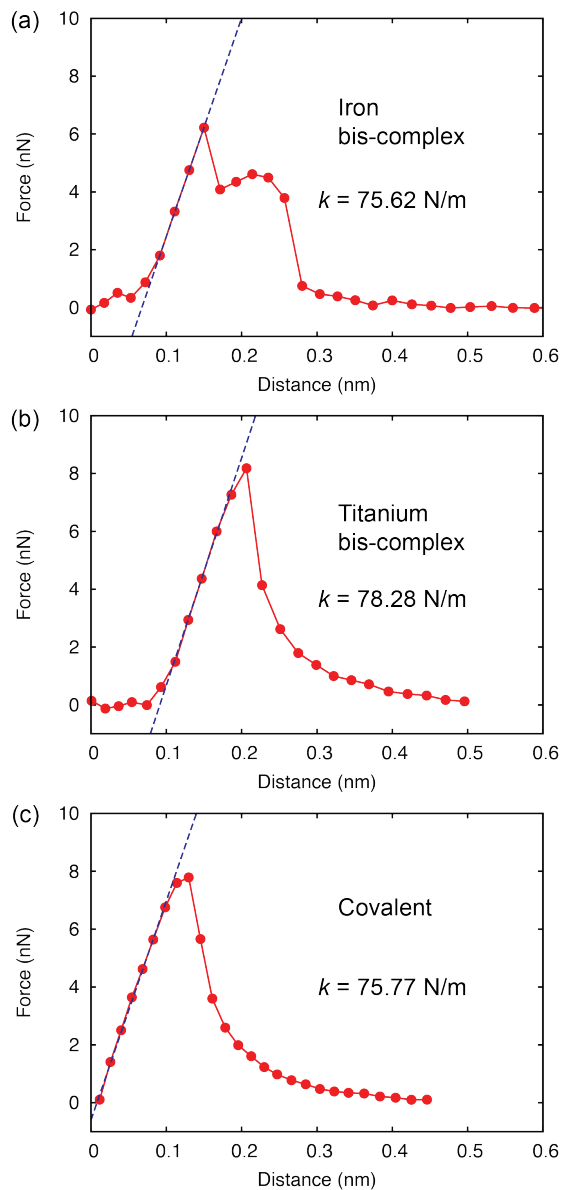

**Figure S1 | Stiffness of bis-catecholate-complexes.** The stiffness is obtained by fitting (dash lines) to the linear elastic part of force-displacement curve for Fe (a) and Ti (b) respectively.

## 2. Bond length and angle information for bis- and tris-complexes.

**Table T1.** Bond length (in unit of Å) and angle information (in unit of degree) for bis-complexes.

|    | $l_1$ | $l_2$ | $l_3$ | $l_4$ | $\theta_1$ | $\theta_2$ | $\theta_3$ | $\theta_4$ |
|----|-------|-------|-------|-------|------------|------------|------------|------------|
| Fe | 1.85  | 1.85  | 1.85  | 1.85  | 85.20      | 89.88      | 85.21      | 89.88      |
| Mn | 1.88  | 1.88  | 1.88  | 1.88  | 85.15      | 90.52      | 85.07      | 90.56      |
| Ti | 1.92  | 1.92  | 1.92  | 1.92  | 82.59      | 91.47      | 82.60      | 91.47      |
| Zn | 2.03  | 2.03  | 2.03  | 2.03  | 83.19      | 90.47      | 83.17      | 90.47      |
| Ca | 2.01  | 2.00  | 2.01  | 2.01  | 79.85      | 91.66      | 79.75      | 91.63      |
| Cu | 2.07  | 2.05  | 2.01  | 2.06  | 81.17      | 77.45      | 82.51      | 77.28      |

**Table T2.** Bond length (in unit of Å) and angle information (in unit of degree) for tris-complexes.

|    | $l_1$ | $l_2$ | $l_3$ | $l_4$ | $l_5$ | $l_6$ |
|----|-------|-------|-------|-------|-------|-------|
| Fe | 1.88  | 1.88  | 1.88  | 1.89  | 1.88  | 1.89  |
| Mn | 1.90  | 1.90  | 1.90  | 1.89  | 1.90  | 1.89  |
| Ti | 2.00  | 2.00  | 2.00  | 2.00  | 2.00  | 2.00  |
| Zn | 2.13  | 2.13  | 2.13  | 2.13  | 2.13  | 2.13  |
| Ca | 2.38  | 2.38  | 2.38  | 2.38  | 2.38  | 2.38  |
| Cu | 2.05  | 2.01  | 2.13  | 2.11  | 2.03  | 2.09  |

**Table T2** (continued)

|    | $\theta_1$ | $\theta_2$ | $\theta_3$ | $\theta_4$ | $\theta_5$ | $\theta_6$ | $\theta_7$ | $\theta_8$ | $\theta_9$ | $\theta_{10}$ | $\theta_{11}$ | $\theta_{12}$ |
|----|------------|------------|------------|------------|------------|------------|------------|------------|------------|---------------|---------------|---------------|
| Fe | 93.58      | 91.05      | 84.64      | 91.05      | 84.66      | 90.87      | 91.07      | 93.66      | 91.27      | 84.68         | 93.34         | 91.11         |
| Mn | 92.34      | 91.71      | 84.16      | 92.11      | 84.00      | 92.23      | 91.73      | 92.29      | 92.55      | 84.05         | 91.95         | 91.68         |
| Ti | 97.30      | 93.12      | 78.27      | 92.76      | 78.20      | 92.72      | 92.88      | 97.34      | 92.96      | 78.39         | 97.46         | 92.99         |
| Zn | 91.88      | 94.88      | 79.10      | 94.76      | 79.26      | 94.68      | 94.88      | 92.02      | 94.78      | 79.23         | 91.87         | 94.65         |
| Ca | 93.14      | 99.52      | 69.65      | 99.45      | 69.72      | 99.21      | 99.26      | 93.47      | 99.44      | 69.69         | 93.34         | 99.31         |
| Cu | 93.83      | 90.96      | 81.38      | 94.43      | 82.29      | 94.37      | 93.50      | 94.60      | 93.37      | 79.32         | 91.31         | 92.27         |
